# Supplementary material for: Spontaneous In Situ Formation of Liposomes from Inert Porous Microparticles for Oral Drug Delivery
Source: MDPI journal article supplement (doi:10.3390/pharmaceutics12080777), 2020-08-15
Supplement: s1 [file s1]

# Supplementary Materials: Spontaneous In Situ Formation of Liposomes from Inert Porous Microparticles for Oral Drug Delivery

Maryam Farzan <sup>1</sup>, Gabriela Québatte <sup>1</sup>, Katrin Strittmatter <sup>1</sup>, Florentine Marianne Hilty <sup>2</sup>, Joachim Schoelkopf <sup>2</sup>, Jörg Huwyler <sup>1</sup> and Maxim Puchkov <sup>1,\*</sup>

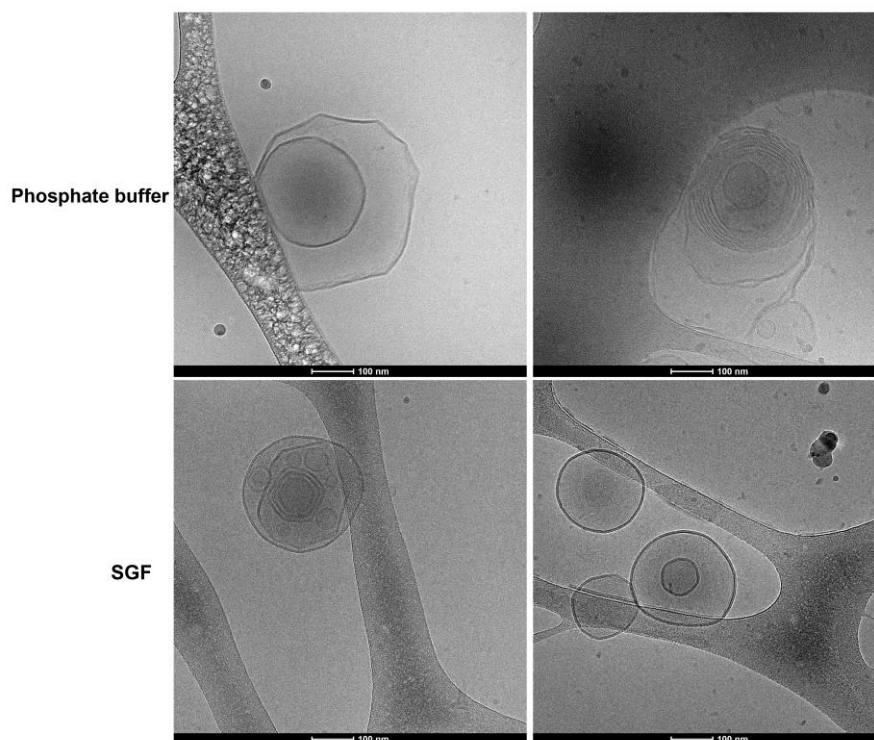

**Figure S1.** Cryo-EM images showing the liposomes created in phosphate buffer and in SGF.

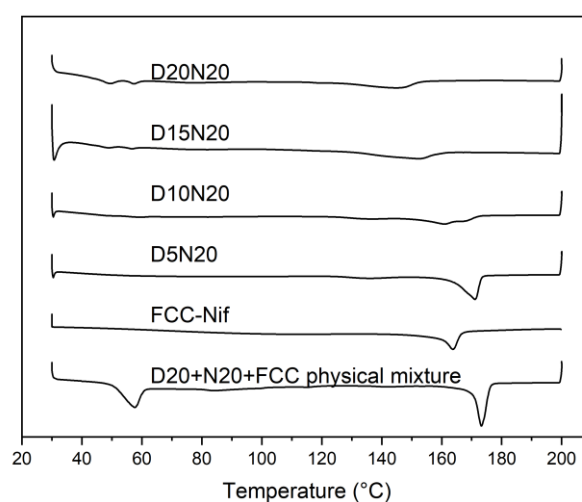

**Figure S2.** DSC spectra of the formulations and physical mixture. The nifedipine melting peak is present at 172 °C. For the formulations with greater phospholipid content (10%, 15%, and 20%) a

melting peak for nifedipine cannot be detected, which is due to the melting of the phospholipid and consequent dissolution the crystalline portion of nifedipine at a temperature below its melting point.

**Table S1.** The time required for 80% of the drug content to dissolve in SGF.

| Formulation Code | Time to 80% Dissolution (min) |
|------------------|-------------------------------|
| D5N10            | 16.0 ± 2.8                    |
| D5N15            | 15.6 ± 3.0                    |
| D5N20            | 8.3 ± 3.05                    |
| D10N10           | 12.8 ± 4.9                    |
| D10N15           | 24.3 ± 8.5                    |
| D10N20           | 8.0 ± 1.0                     |
| D15N10           | 34.5 ± 11.5                   |
| D15N15           | 23.6 ± 4.5                    |
| D15N20           | 35.0 ± 4.5                    |
| D20N10           | 68.5 ± 31.8                   |
| D20N15           | 56 ± 12.2                     |
| D20N20           | 48.66 ± 4.9                   |

**Video S1: Formation of liposomes in SGF.**

The video has been uploaded in an external data repository.  
<https://doi.org/10.7910/DVN/2LXYW1>

**References**

1. J.M. Ting, T.S. Navale, F.S. Bates, T.M. Reineke, Design of Tunable Multicomponent Polymers as Modular Vehicles To Solubilize Highly Lipophilic Drugs, Macromolecules. 47 (2014) 6554–6565. <https://doi.org/10.1021/ma501839s>.
2. I. Vitez, Utilization of DSC for Pharmaceutical crystal form quantitation, Journal of Thermal Analysis and Calorimetry. 78 (2005) 33–45. <https://doi.org/10.1023/b:jtan.0000042151.60566.0f>.
3. B. Shah, V.K. Kakumanu, A.K. Bansal, Analytical techniques for quantification of amorphous/crystalline phases in pharmaceutical solids, Journal of Pharmaceutical Sciences. 95 (2006) 1641–1665. <https://doi.org/10.1002/jps.20644>.
